# Supplementary material
Source: MDPI journal article supplement (https://www.mdpi.com/1424-8247/17/5/611)

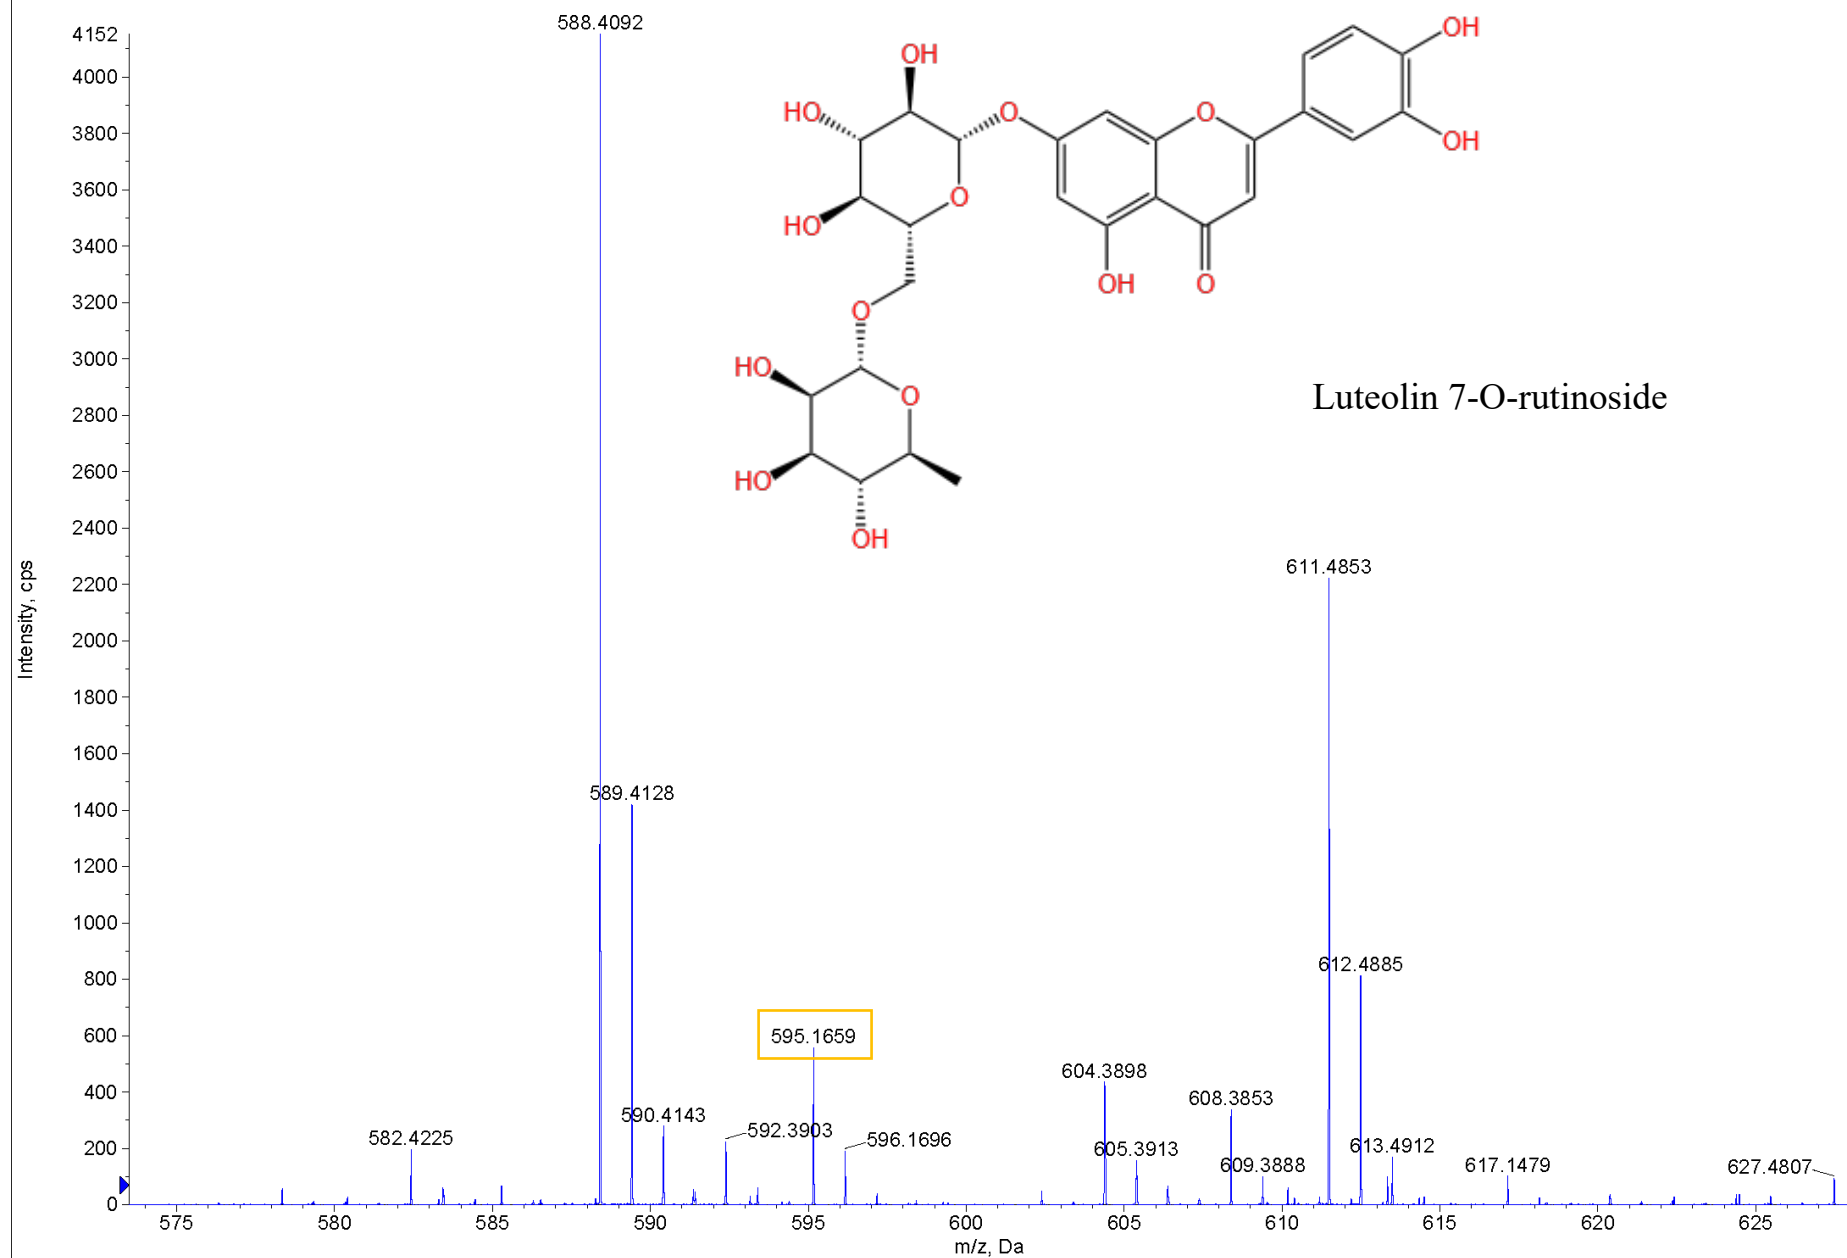

+TOF MS: Exp 1, 19.9460 to 20.8817 min from Sample 1 (20221229-POS-70H) of 20221229-POS-70H.wiff different calibrations (DuoSpra...

Max. 4384.7 cps.

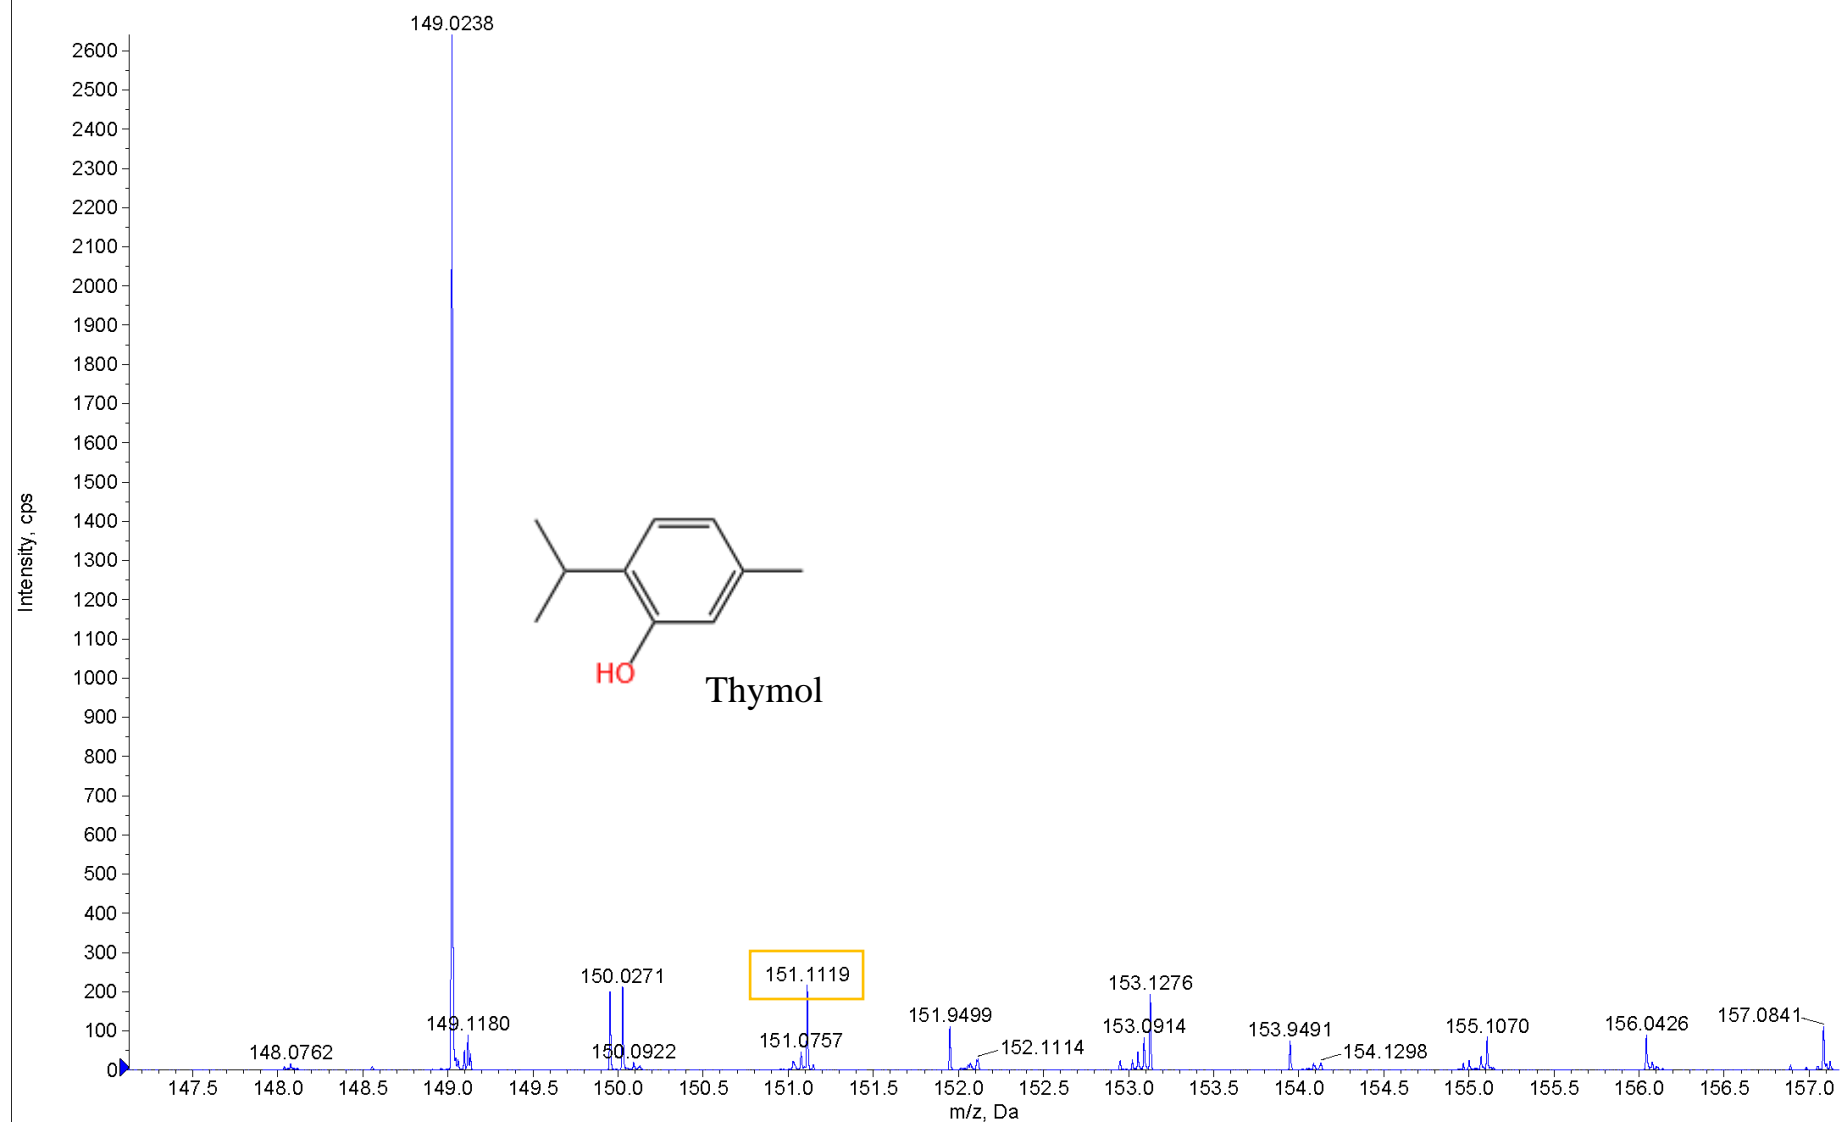

+TOF MS: Exp 1, 22.0044 to 22.8732 min from Sample 1 (20221229-POS-70H) of 20221229-POS-70H.wiff different calibrations (DuoSpray...

Max. 1.9e4 cps.

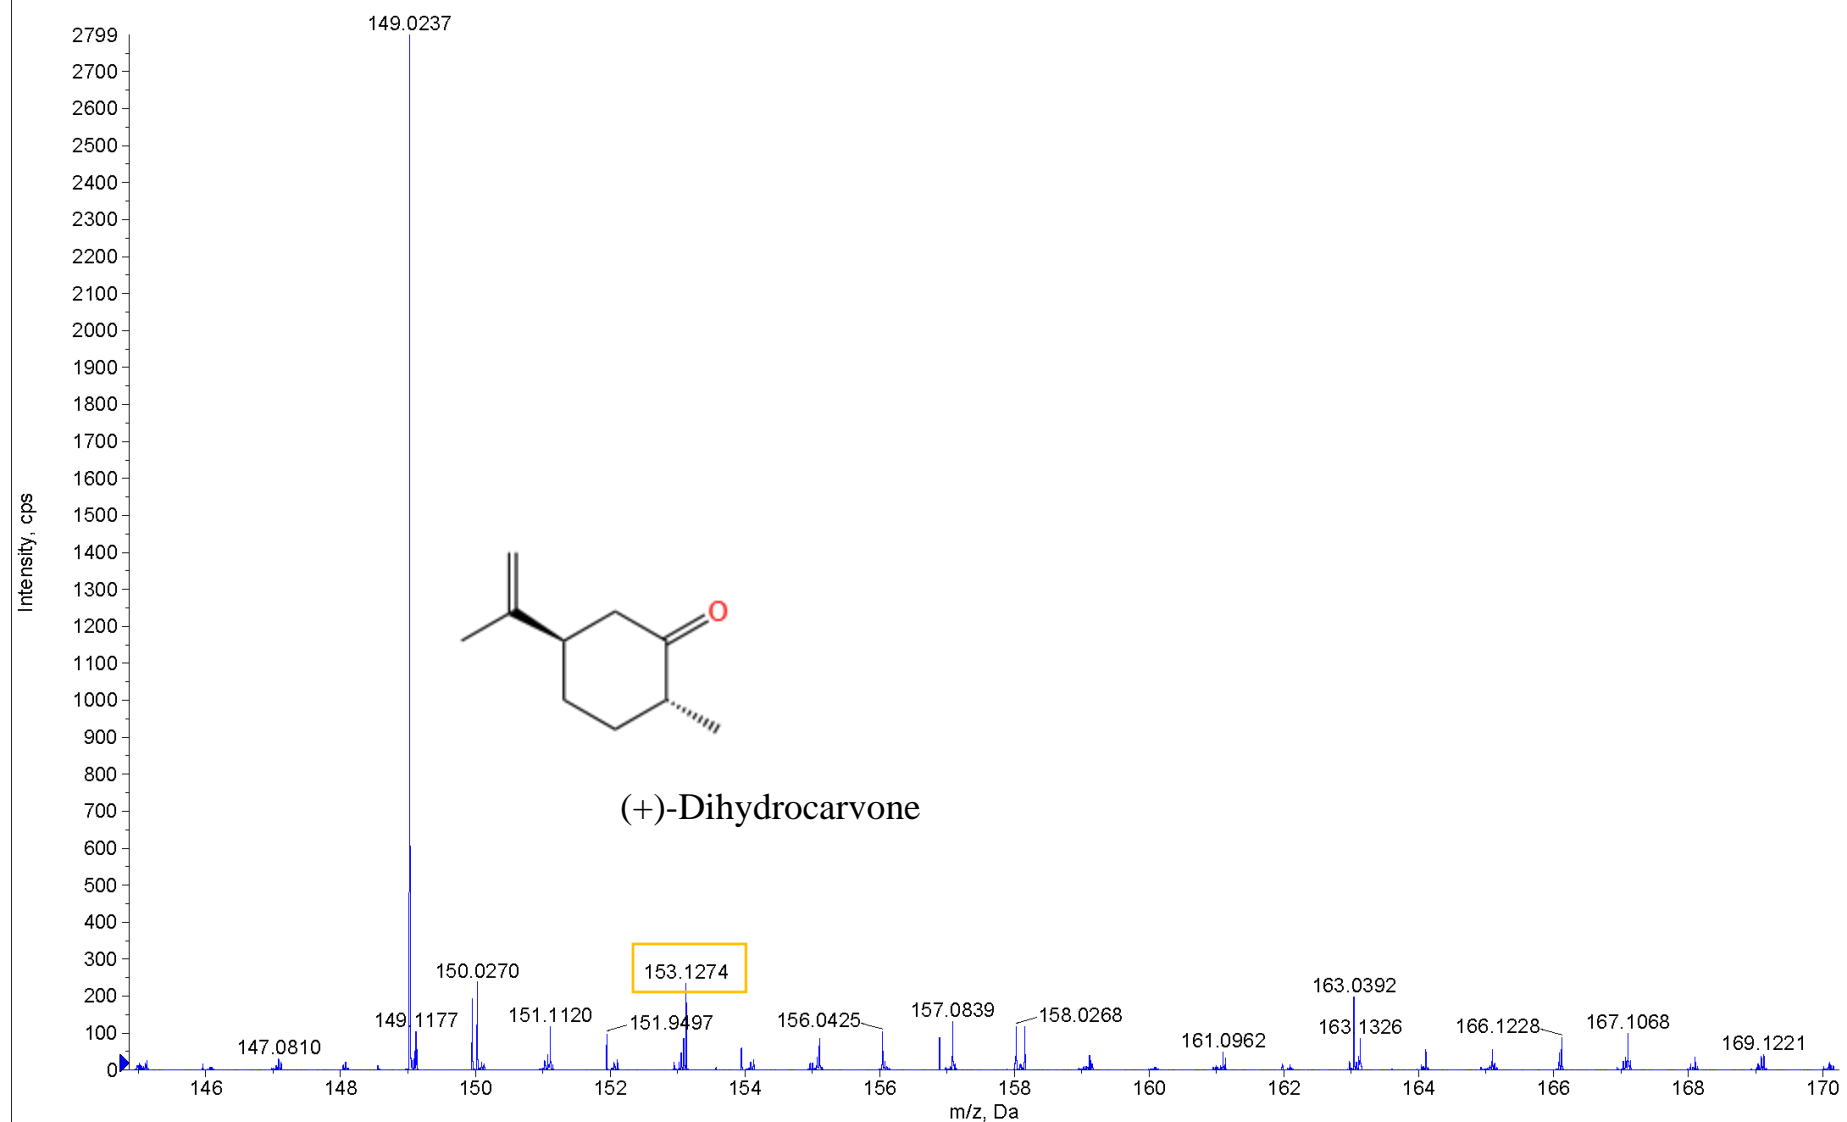

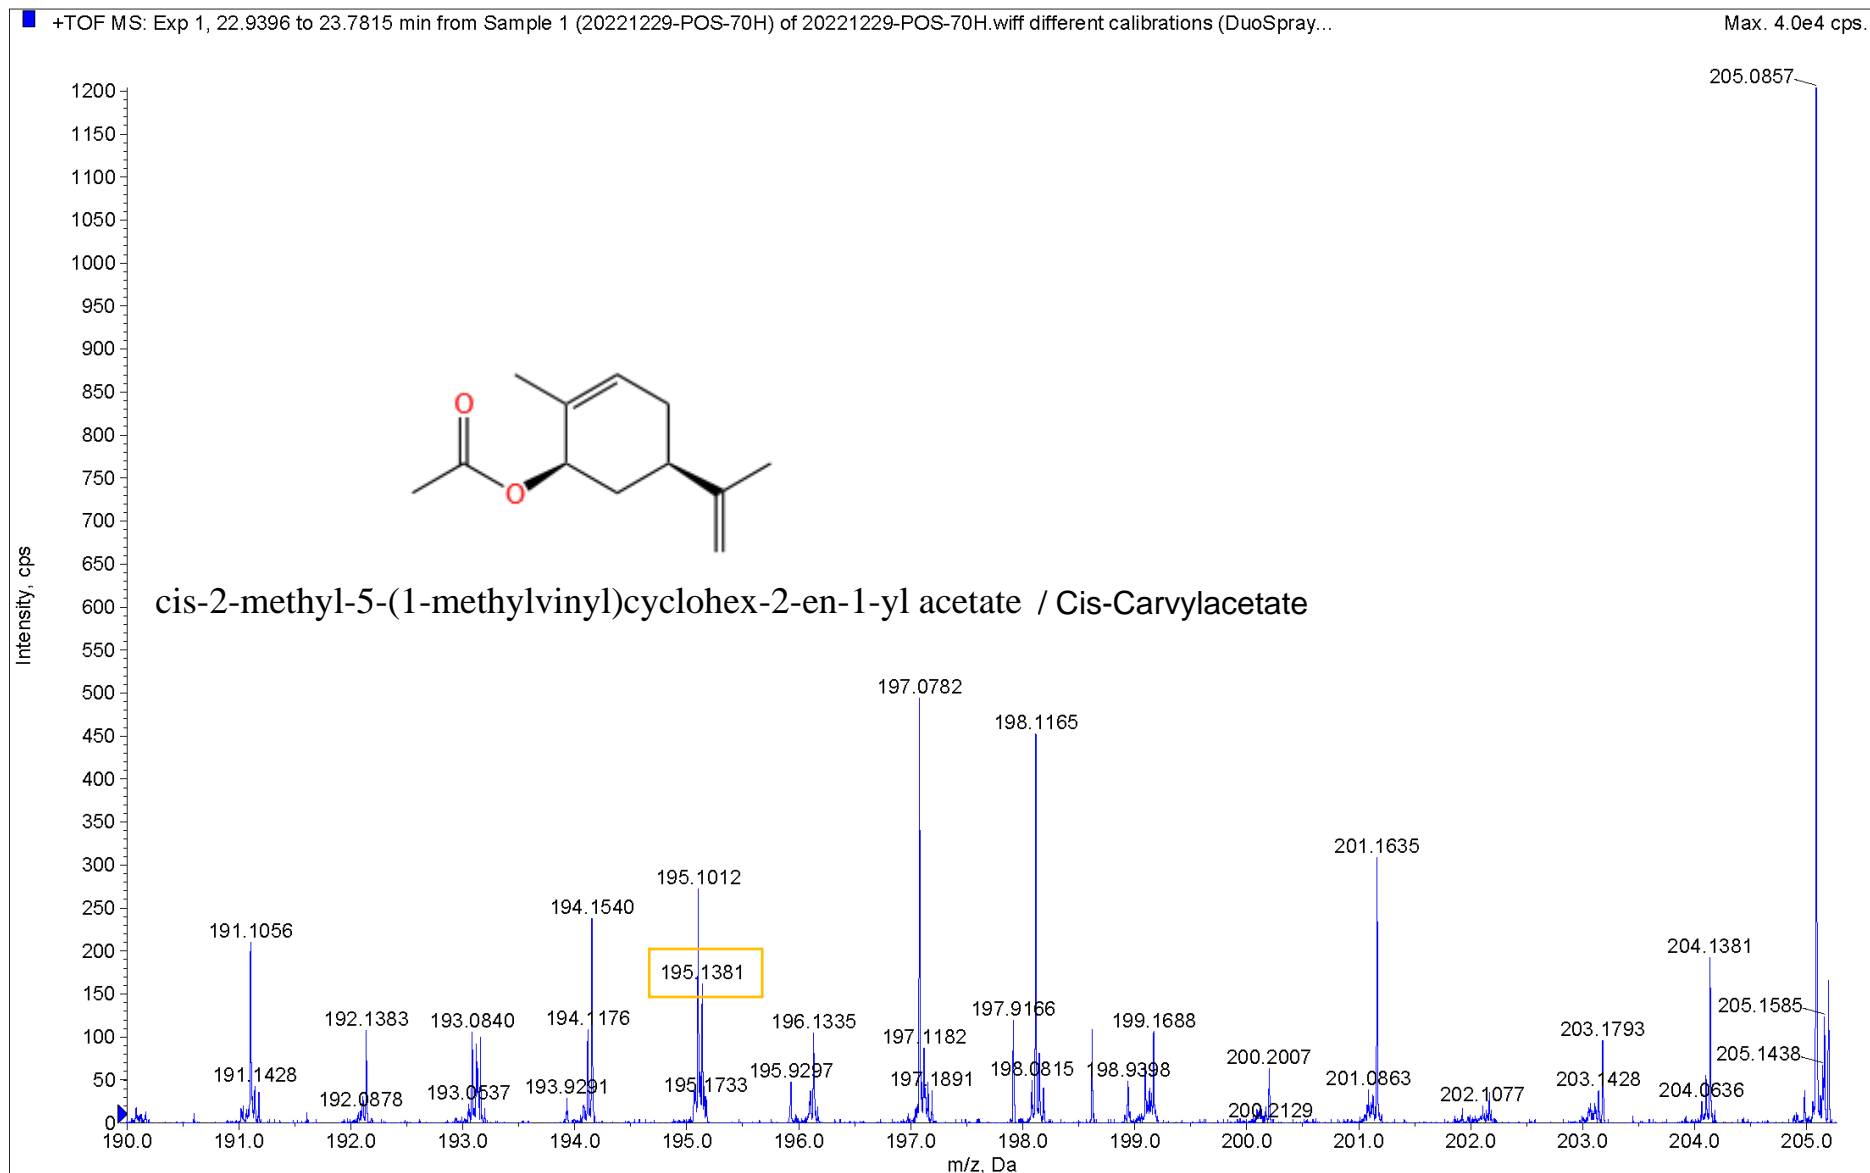

+TOF MS: Exp 1, 27.2168 to 28.1856 min from Sample 1 (20221229-POS-70H) of 20221229-POS-70H.wiff different calibrations (DuoSpray...

Max. 4.3e5 cps.

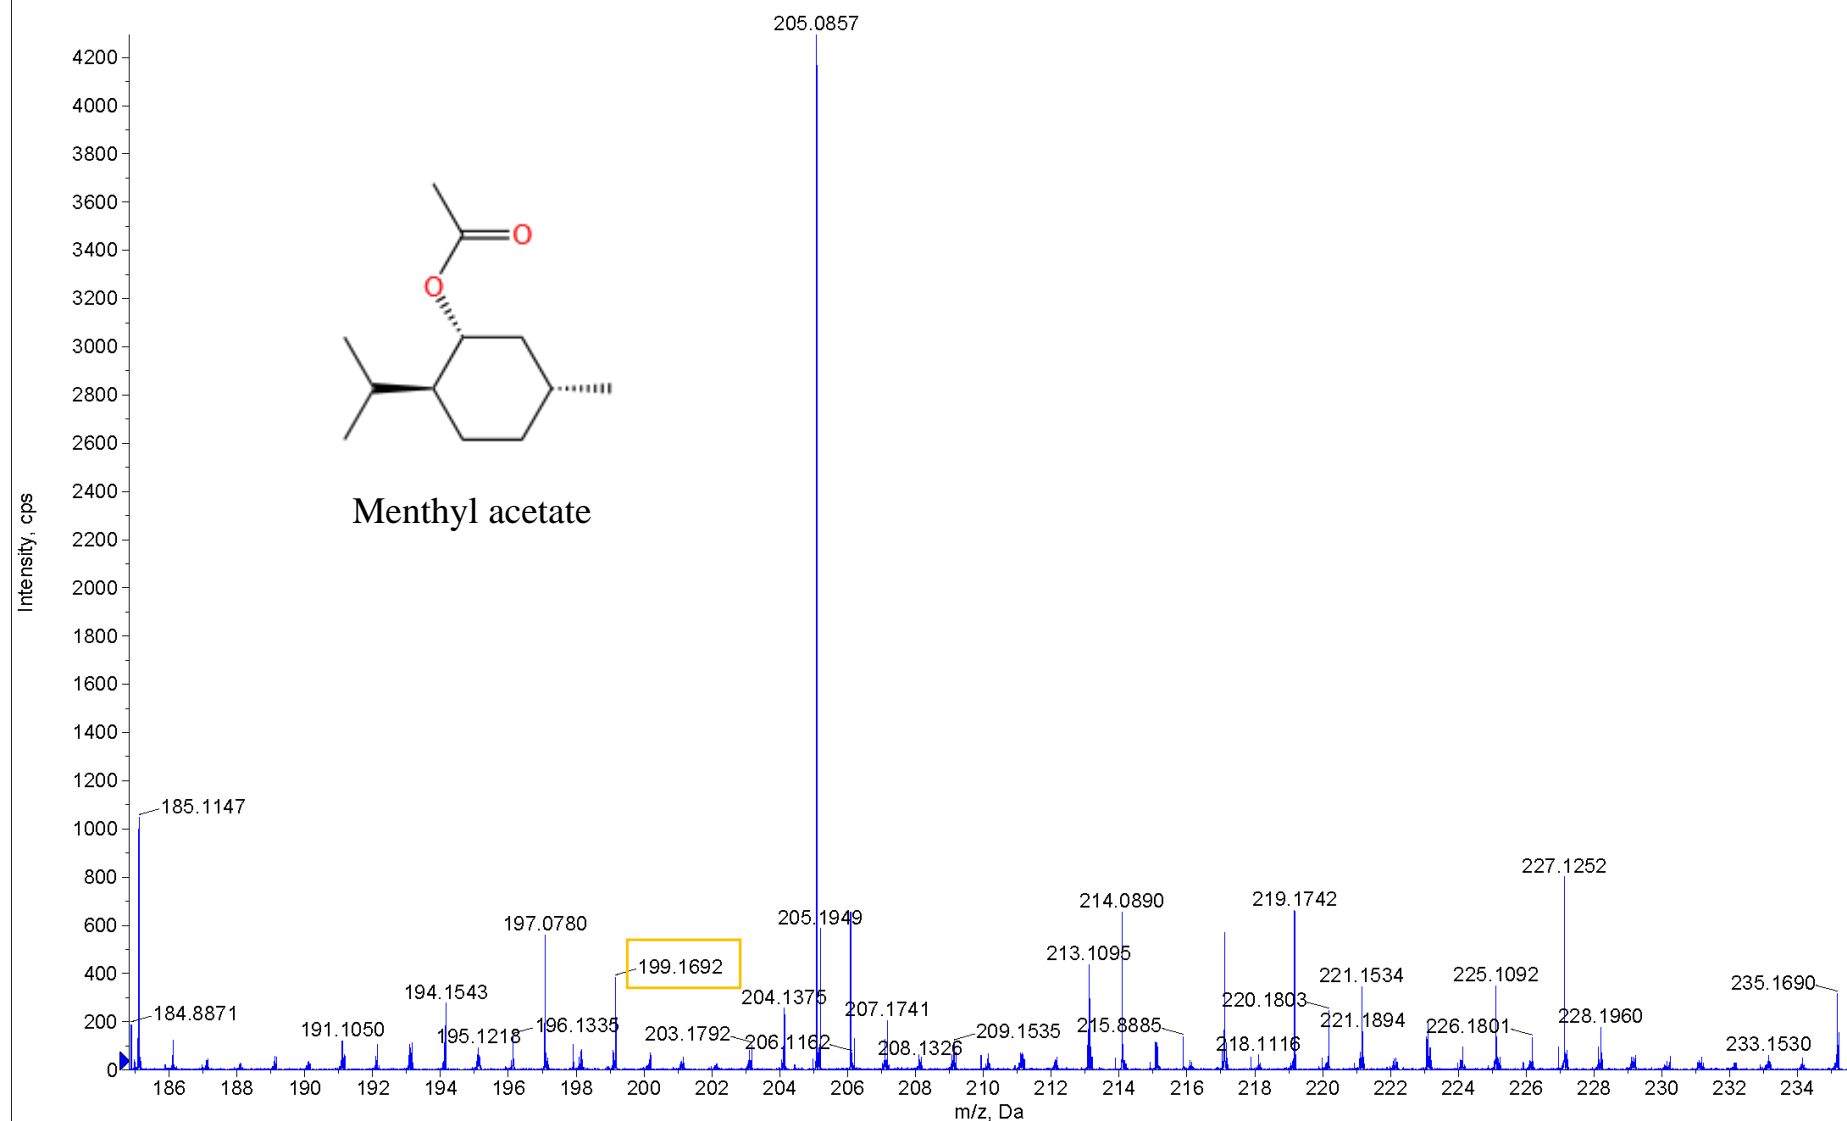

+TOF MS: Exp 1, 18.9256 to 19.8425 min from Sample 1 (20221229-POS-70H) of 20221229-POS-70H.wiff different calibrations (DuoSpra...

Max. 2857.3 cps.

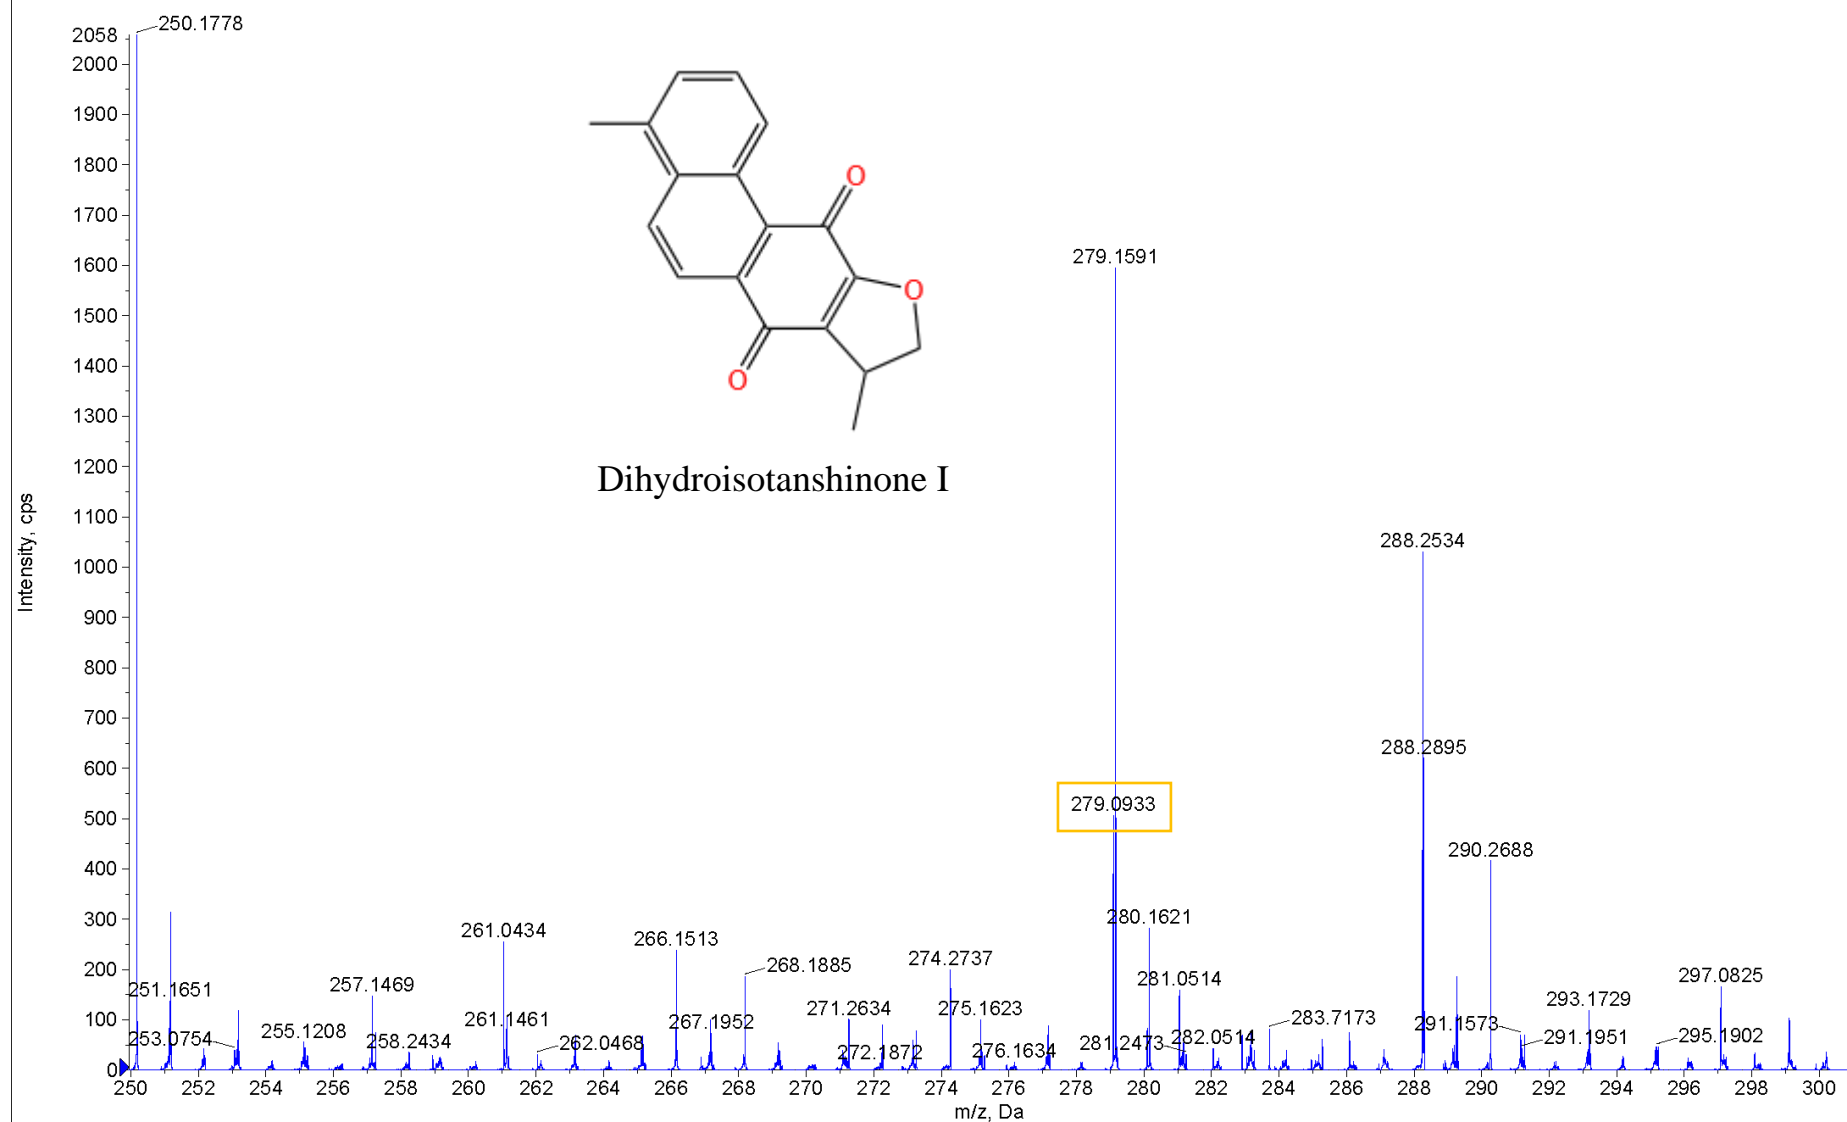

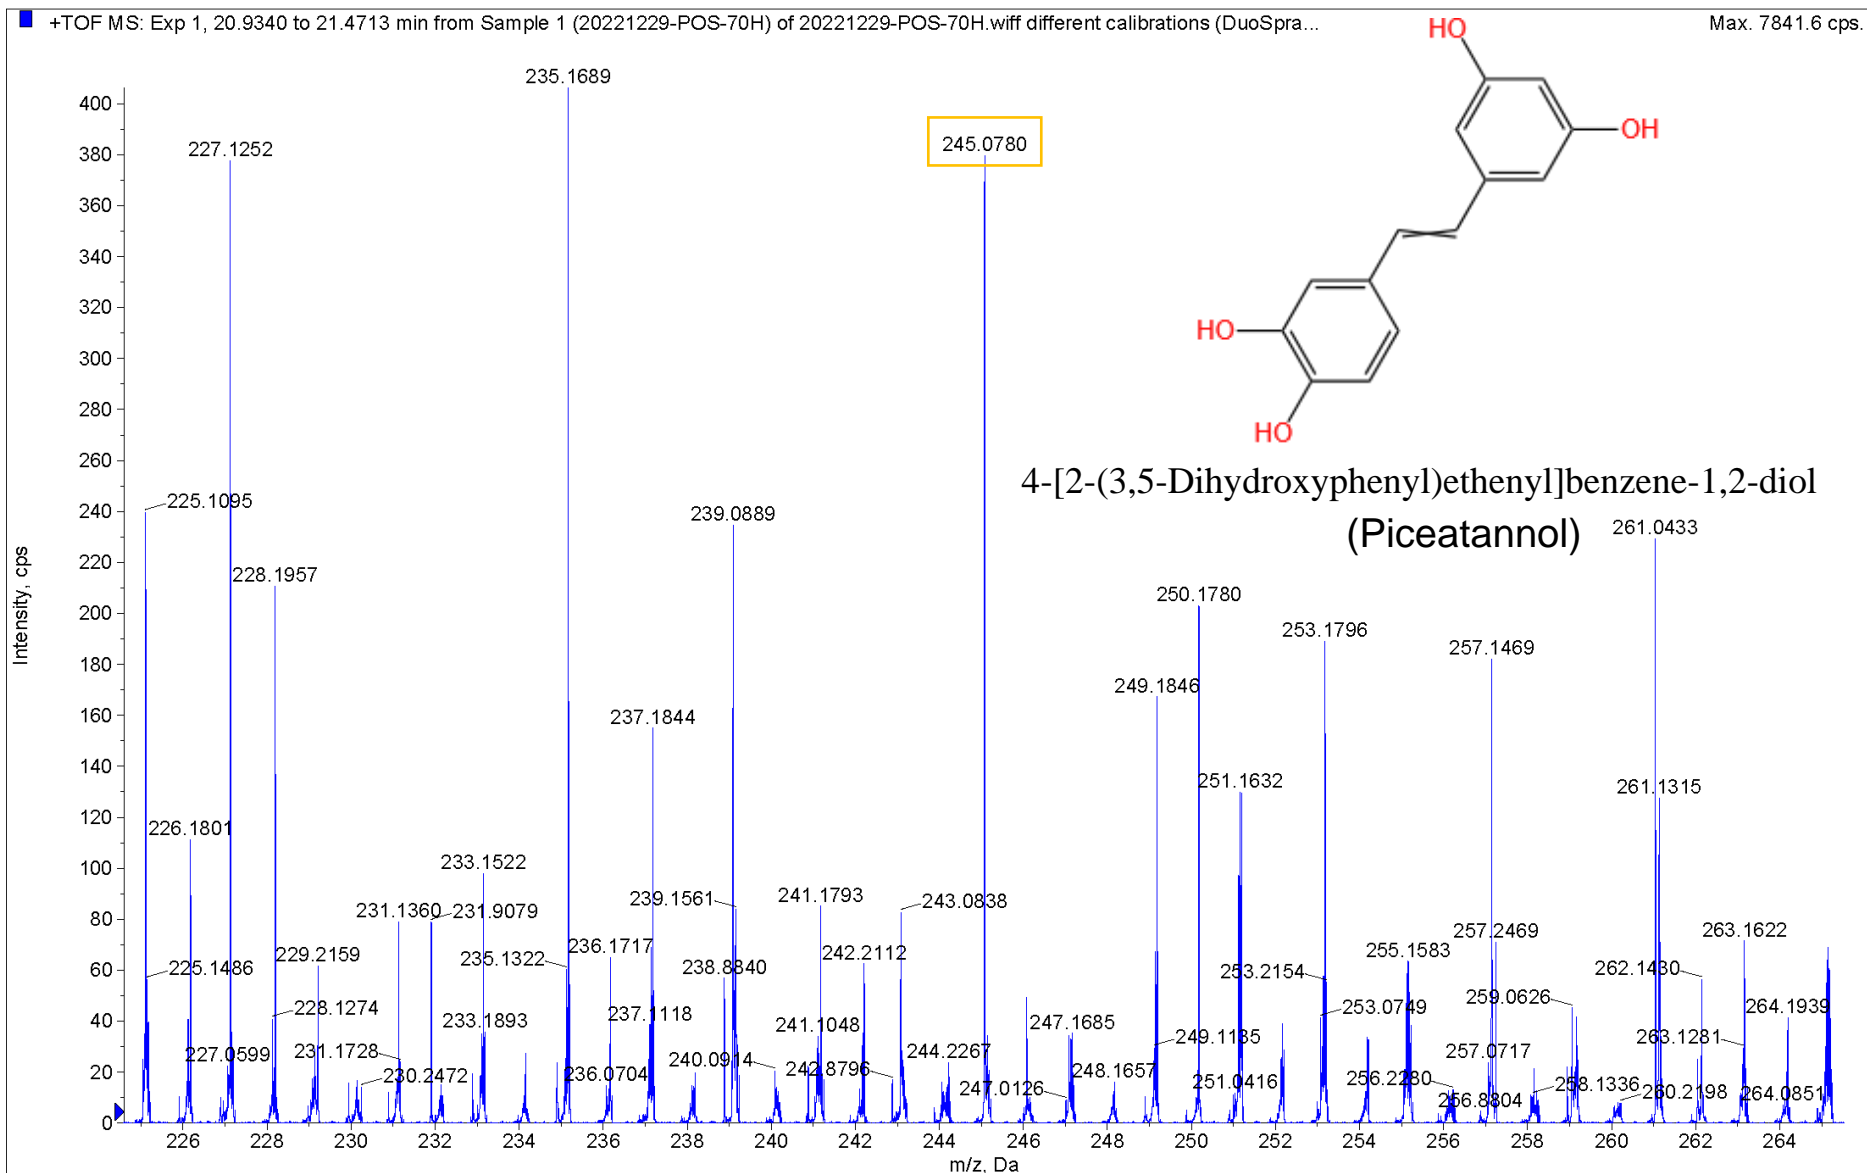

+TOF MS: Exp 1, 26.9150 to 27.7250 min from Sample 1 (20221229-POS-70H) of 20221229-POS-70H.wiff different calibrations (DuoSpray...

Max. 3.4e5 cps.

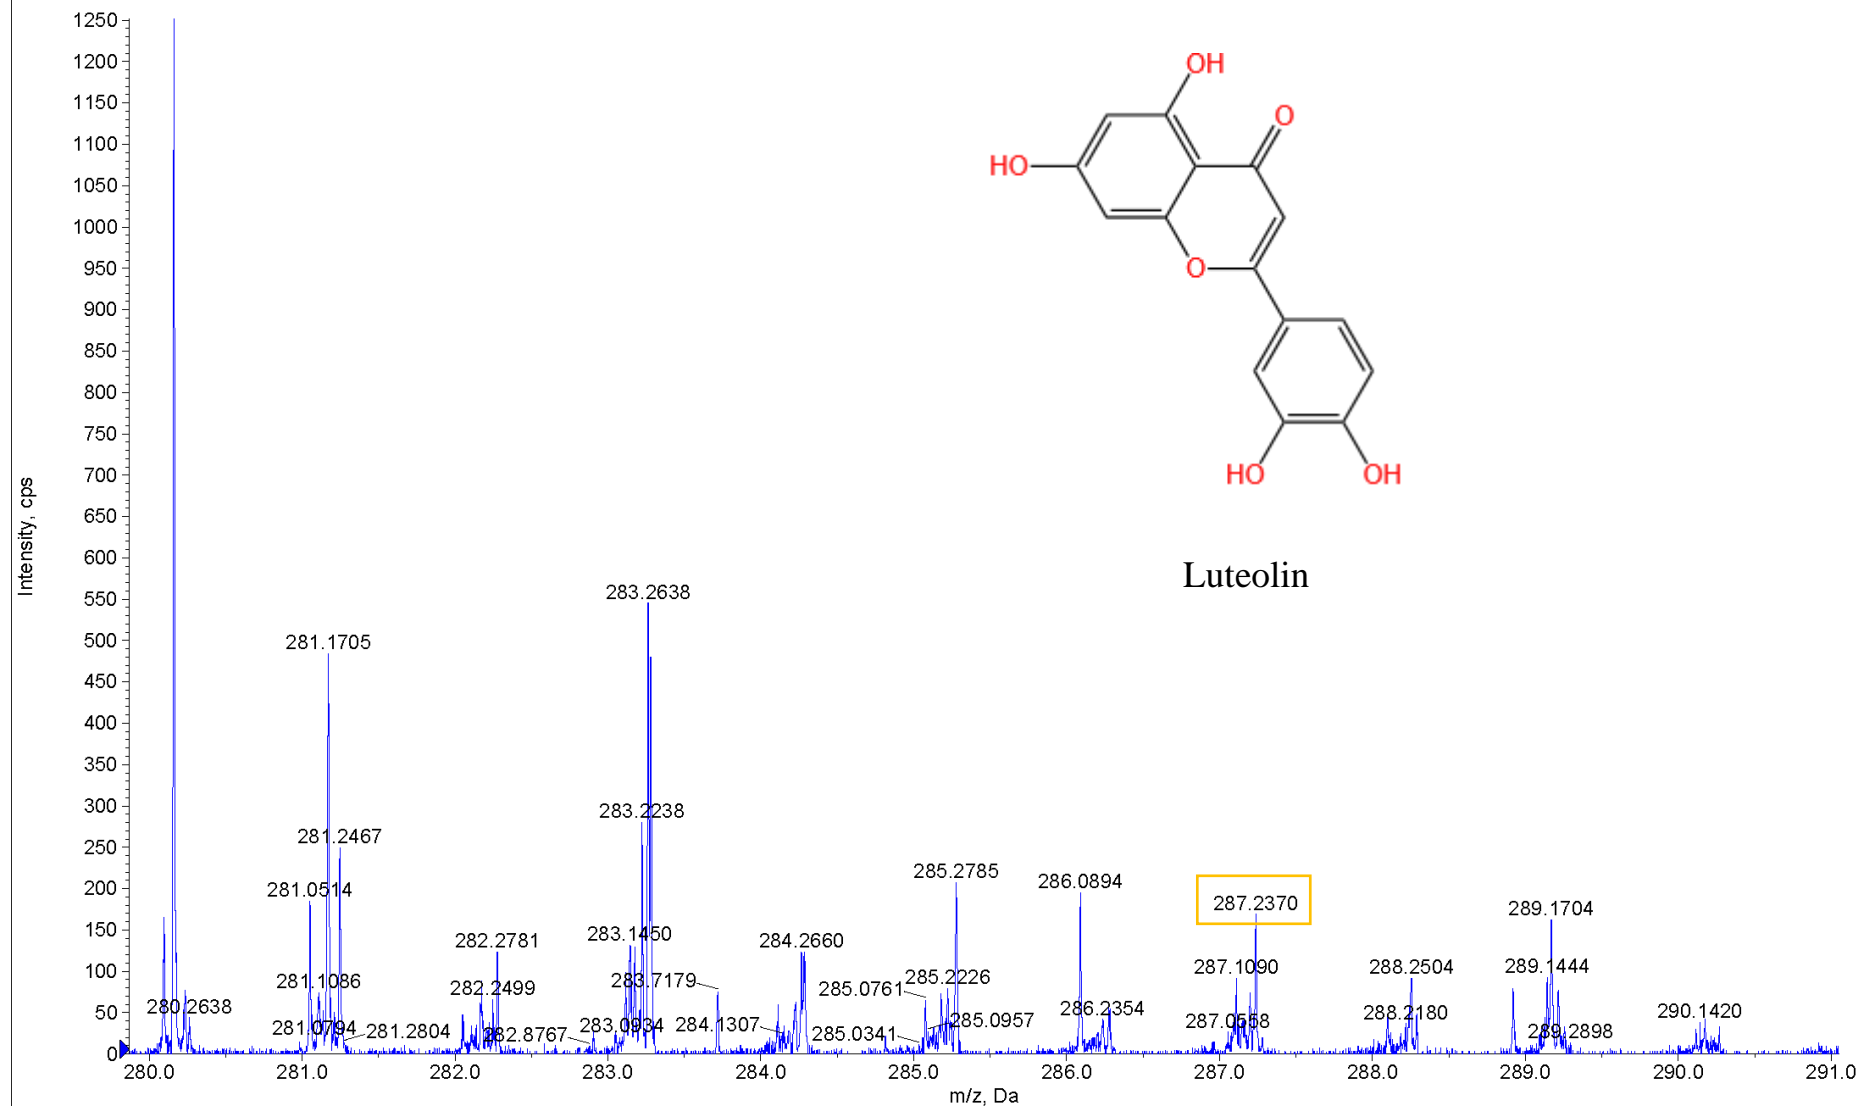

+TOF MS: Exp 1, 22.8899 to 23.6518 min from Sample 1 (20221229-POS-70H) of 20221229-POS-70H.wiff different calibrations (DuoSpray...

Max. 4.4e4 cps.

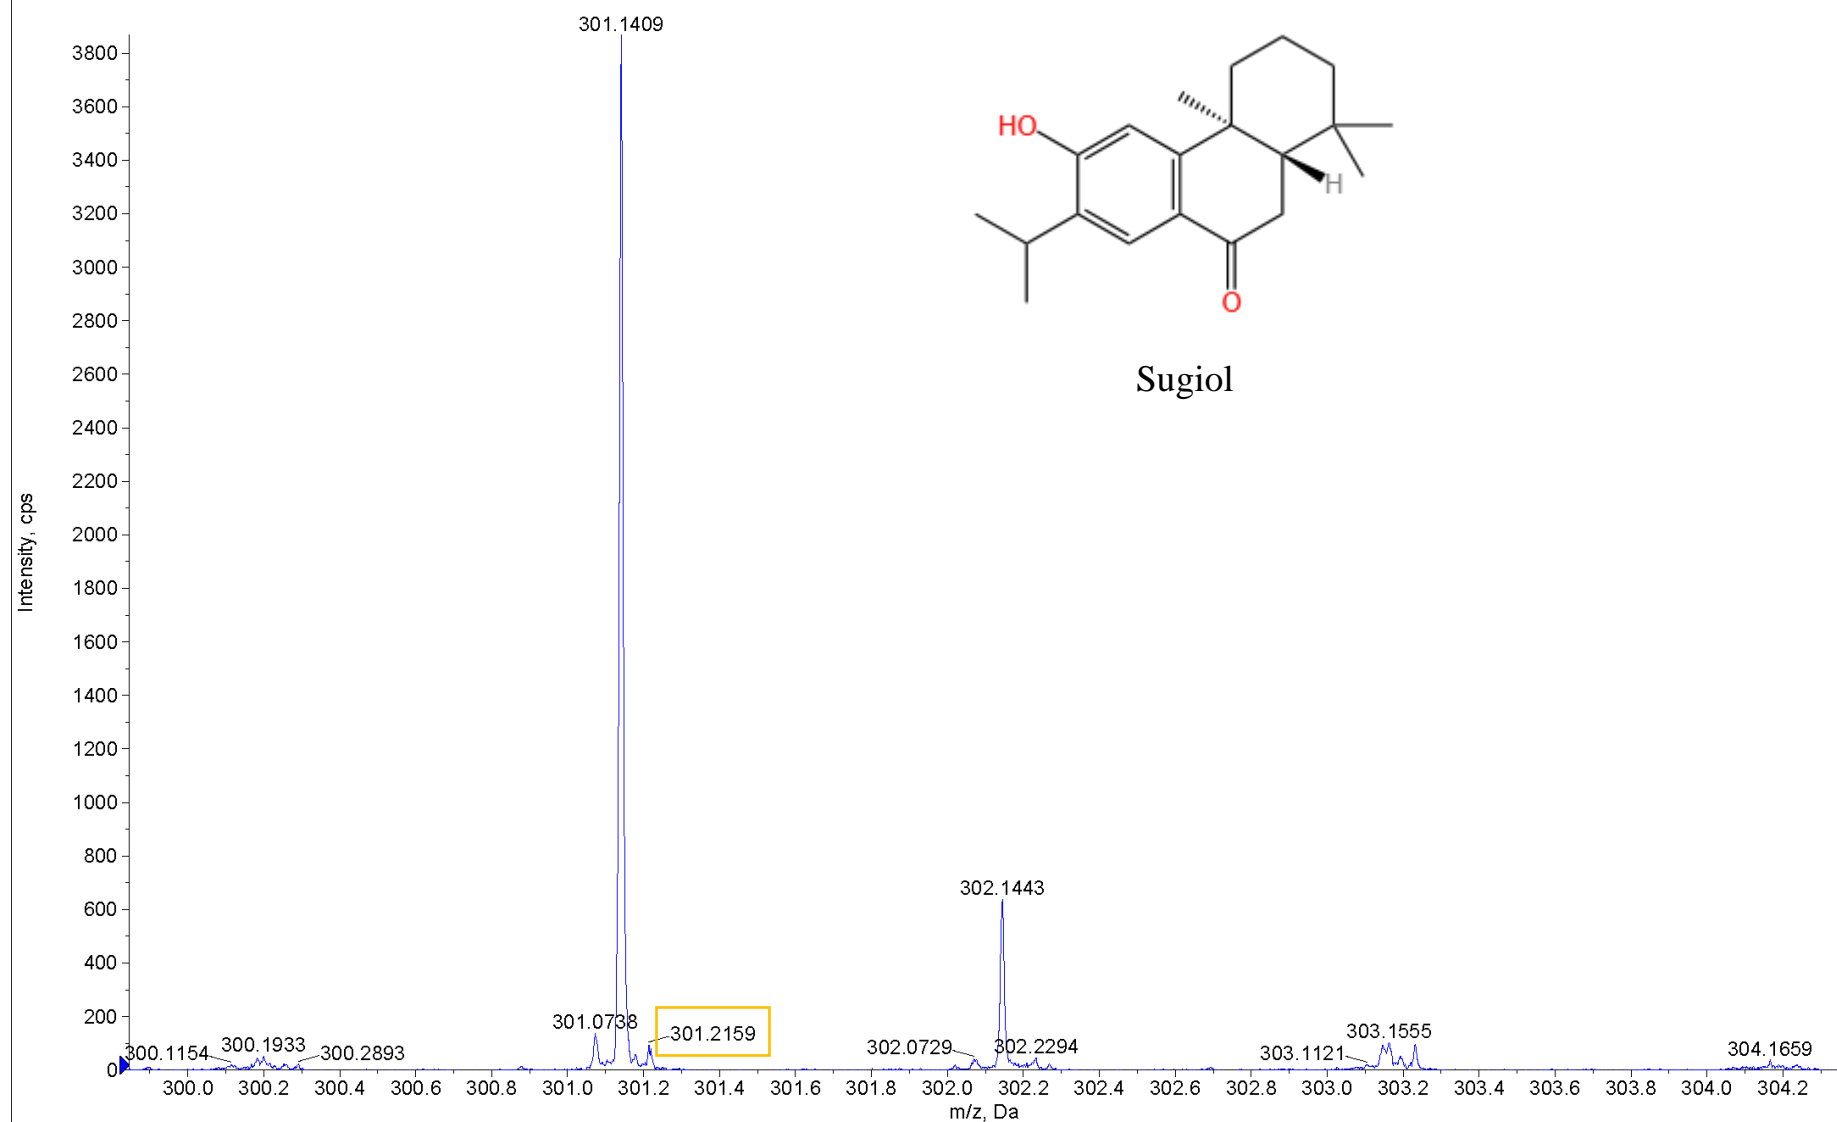

+TOF MS: Exp 1, 26.0099 to 26.7720 min from Sample 1 (20221229-POS-70H) of 20221229-POS-70H.wiff different calibrations (DuoSpray... Max. 1.8e5 cps.

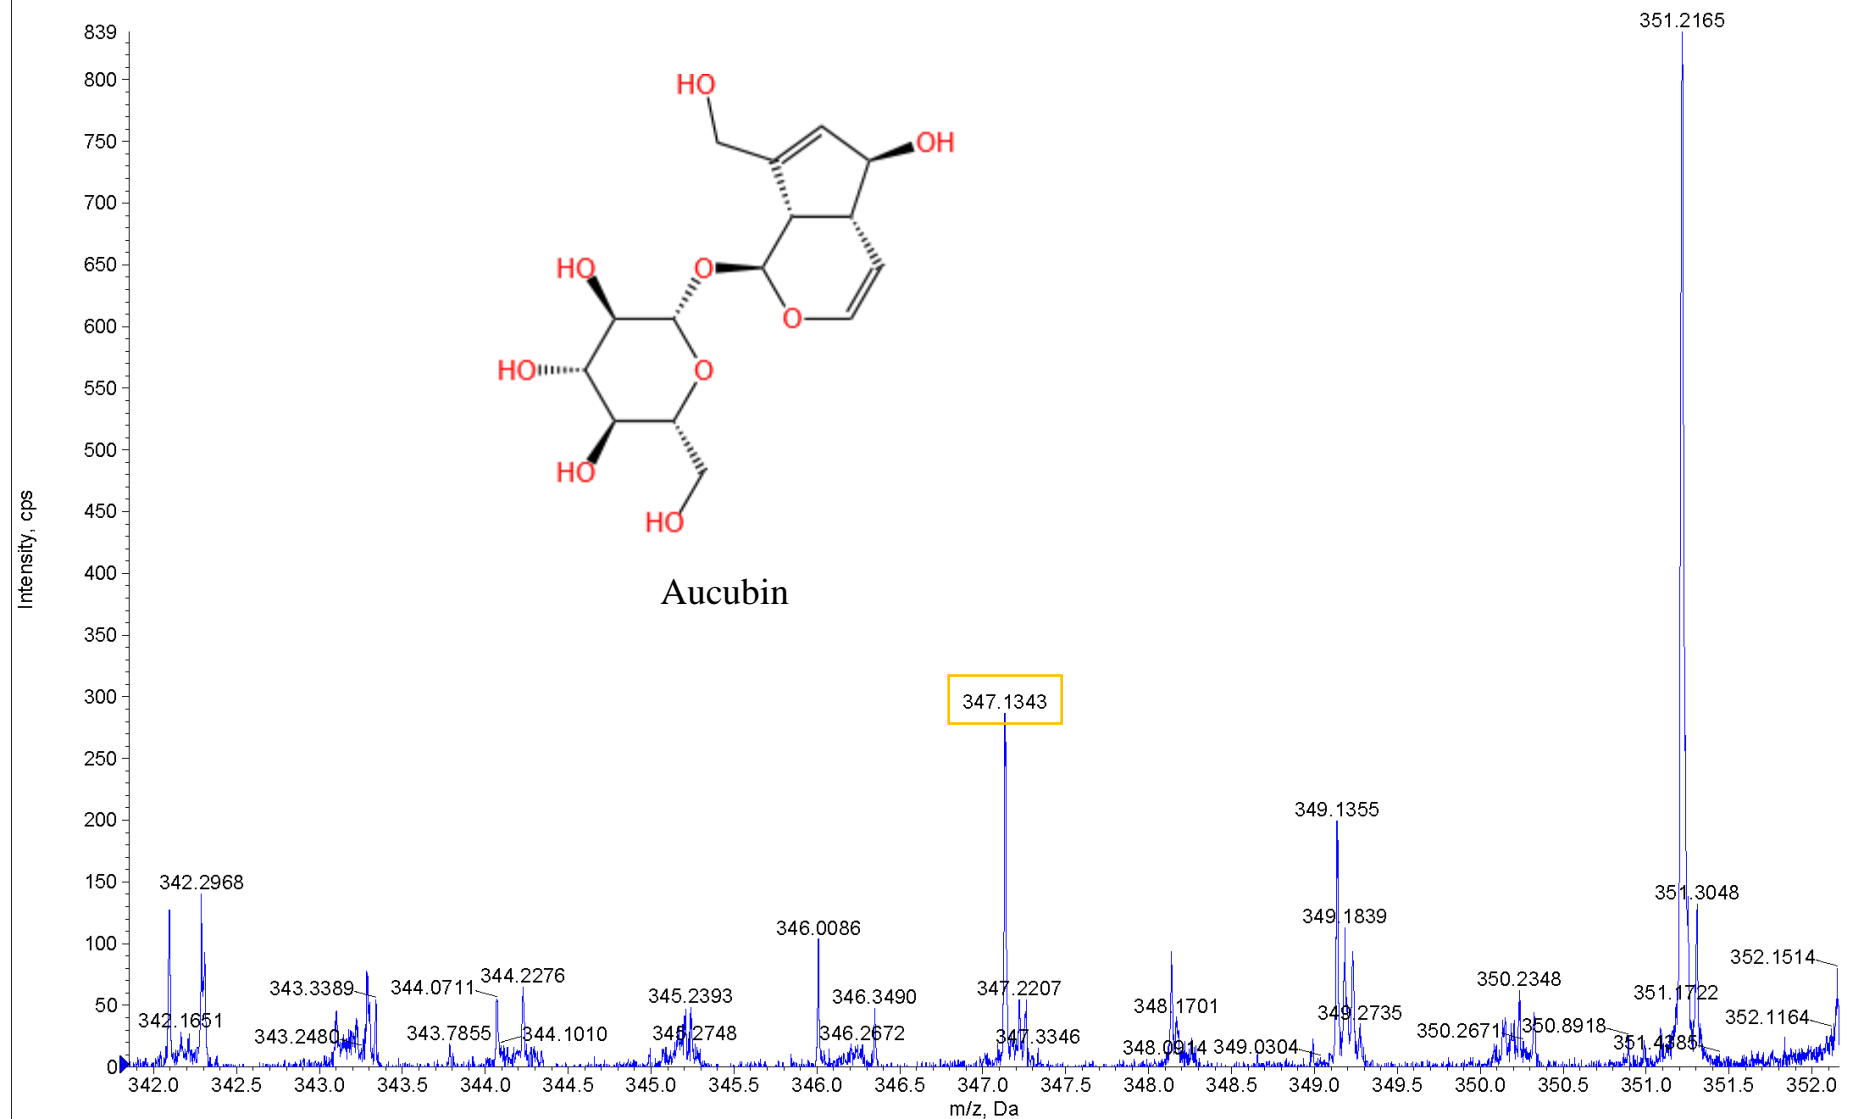

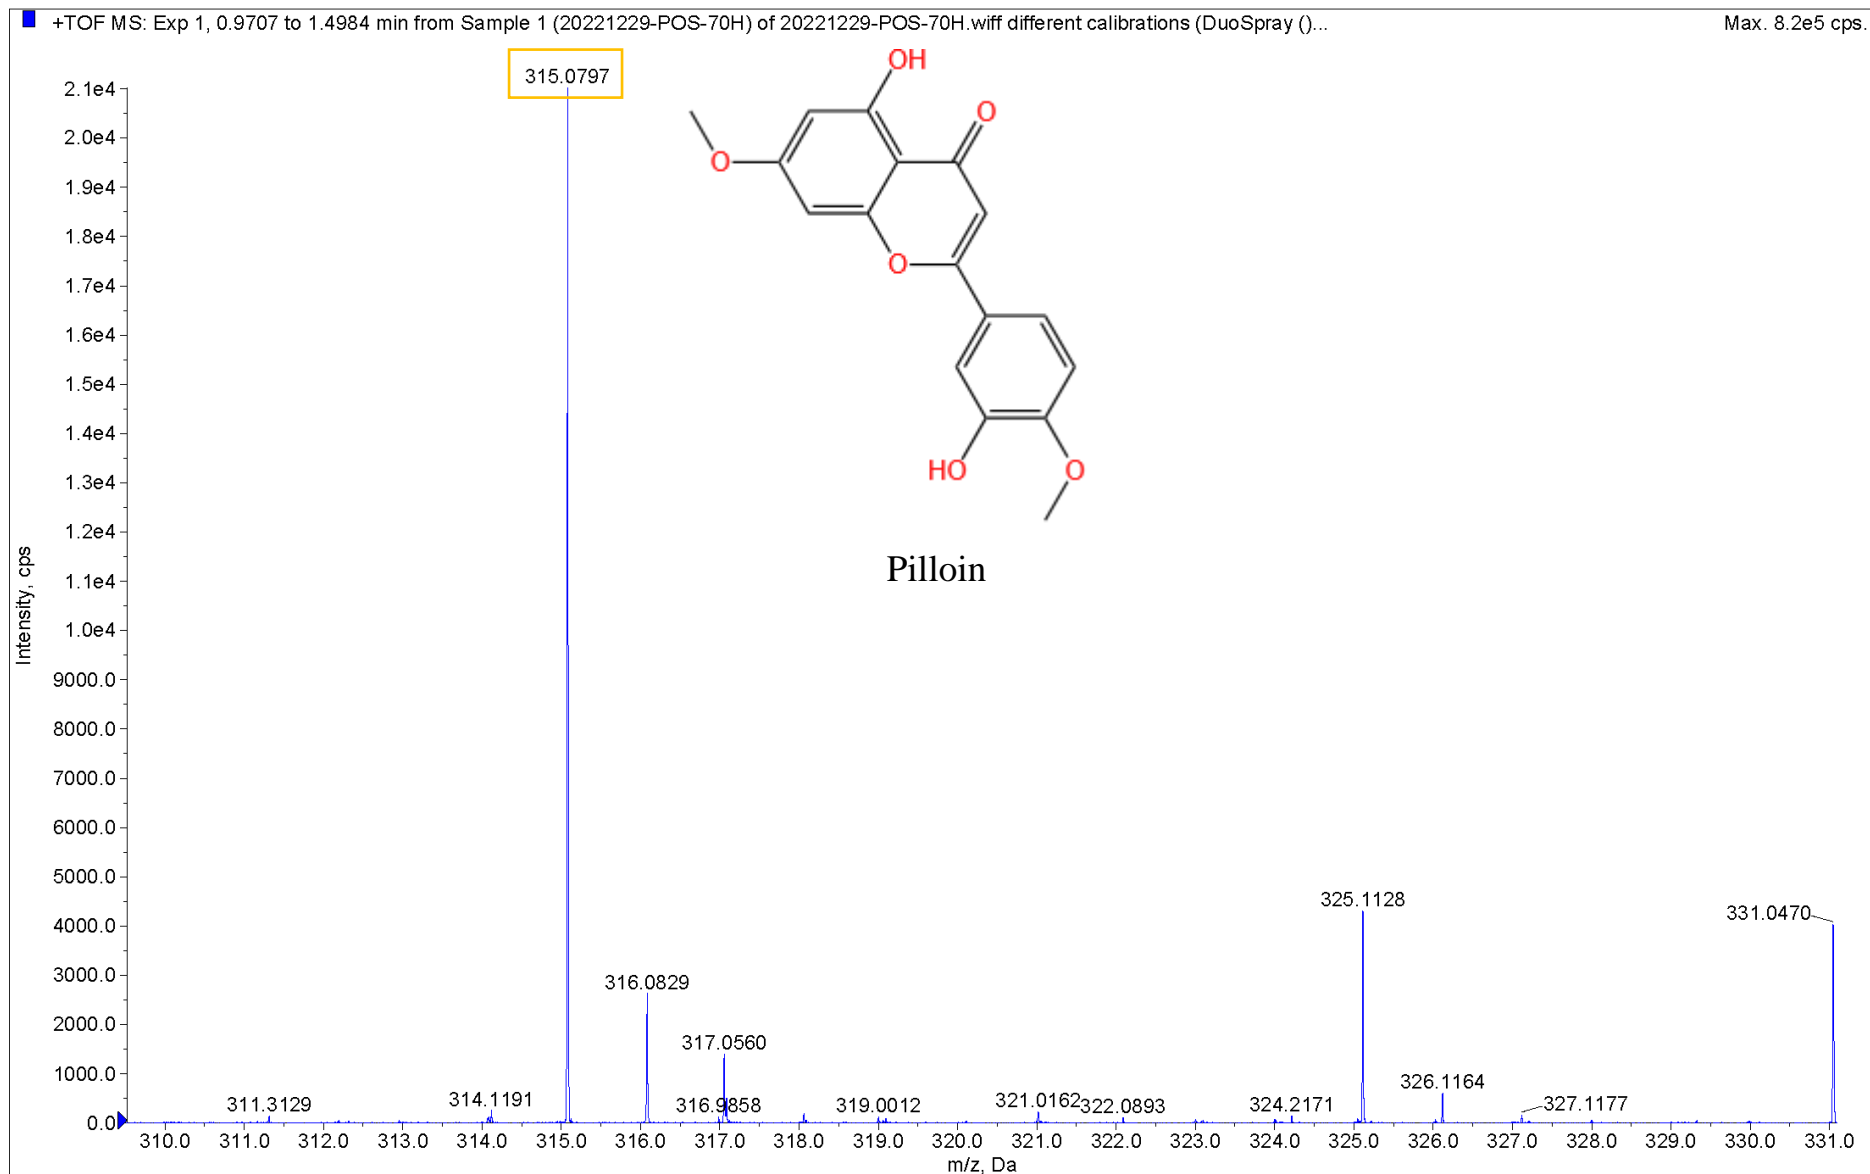

+TOF MS: Exp 1, 30.9527 to 31.4832 min from Sample 1 (20221229-POS-70H) of 20221229-POS-70H.wiff different calibrations (DuoSpray...

Max. 2.7e5 cps.

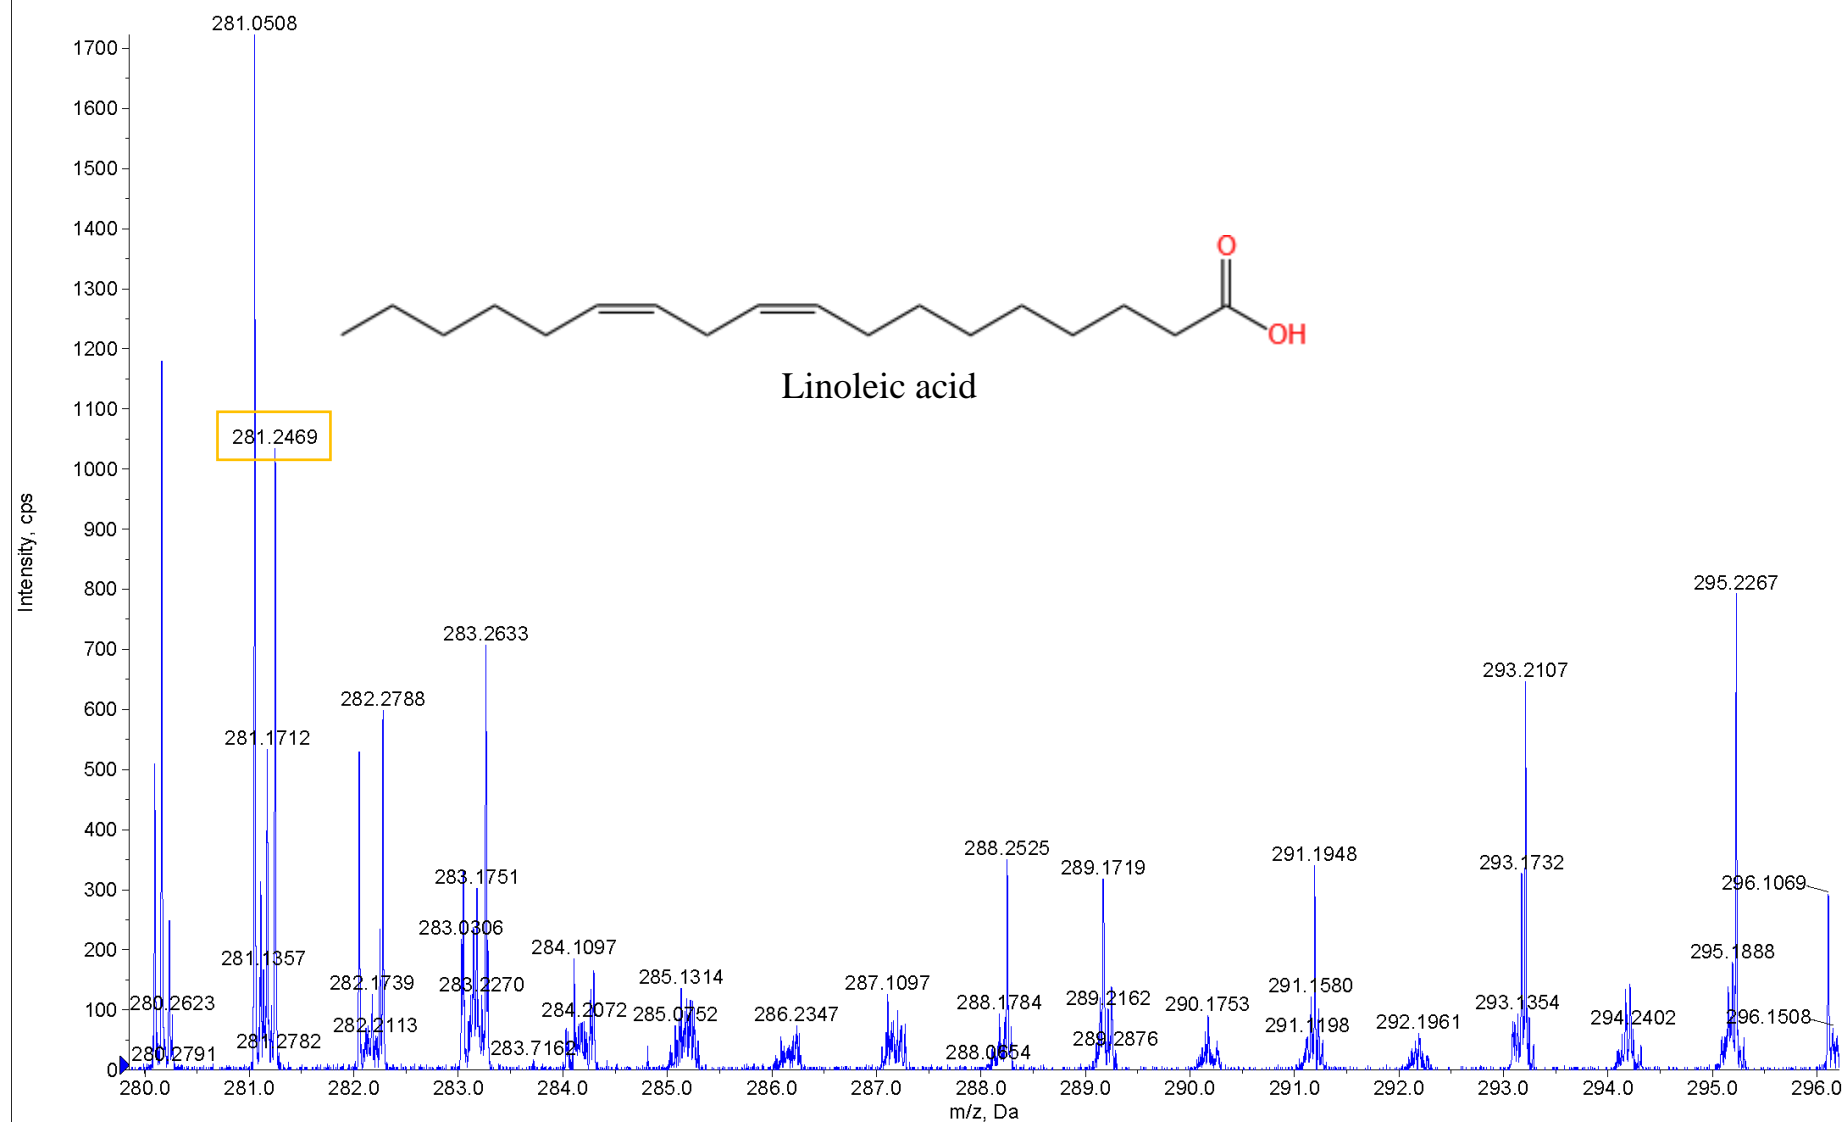

+TOF MS: Exp 1, 11.9642 to 12.6617 min from Sample 1 (20221229-POS-70H) of 20221229-POS-70H.wiff different calibrations (DuoSpra...

Max. 3768.7 cps.

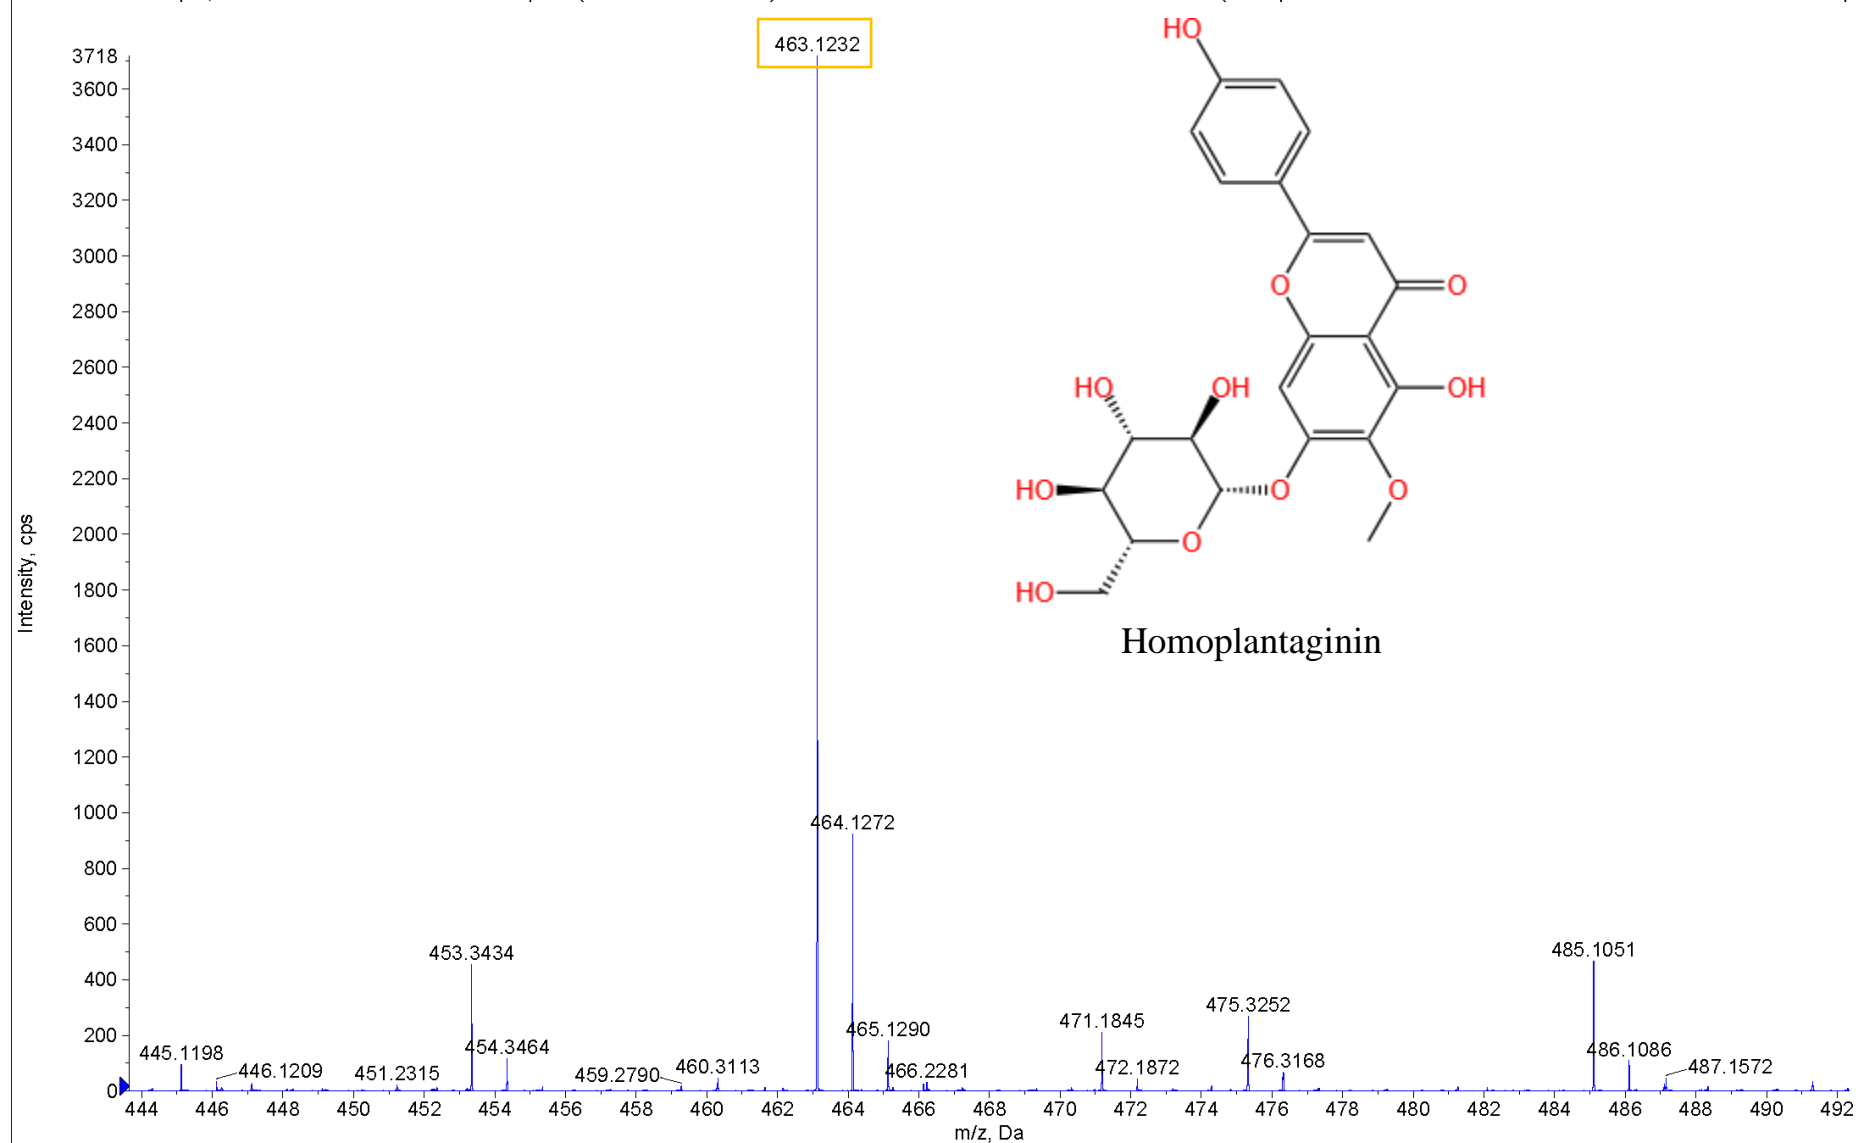

Supplement: s1 [file s1]
